# Supplementary material
Source: MDPI journal article supplement (https://www.mdpi.com/2076-3417/13/18/10074)
Supplement: s1 [file s1]

## Acknowledgements

### 1. INSIST Investigators

Charles Majoie<sup>1</sup>, Ed van Bavel<sup>2</sup>, Henk Marquering<sup>1,2</sup>, Nerea Arrarte-Terreros<sup>1,2</sup>, Praneeta Konduri<sup>1,2</sup>, Sissy Georgakopoulou<sup>2</sup>, Yvo Roos<sup>3</sup>, Alfons Hoekstra<sup>4</sup>, Raymond Padmos<sup>4</sup>, Claire Miller<sup>4</sup>, Victor Azizi<sup>4</sup>, Aad van der Lugt<sup>5</sup>, Diederik W.J. Dippel<sup>6</sup>, Hester L. Lingsma<sup>7</sup>, Nikki Boodt<sup>5,6,7</sup>, Noor Samuels<sup>5,6,7</sup>, Stephen Payne<sup>8</sup>, Tamas Jozsa<sup>8</sup>, Wahbi K. El-Bouri<sup>8</sup>, Michael Gilvarry<sup>9</sup>, Ray McCarthy<sup>9</sup>, Sharon Duffy<sup>9</sup>, Anushree Dwivedi<sup>9</sup>, Behrooz Fereidoonenezhad<sup>10</sup>, Kevin Moerman<sup>10</sup>, Patrick McGarry<sup>10</sup>, Senna Staessens<sup>11</sup>, Simon de Meyer<sup>11</sup>, Francesco Migliavacca<sup>12</sup>, Gabriele Dubini<sup>12</sup>, Giulia Luraghi<sup>12</sup>, Sara Bridio<sup>12</sup>, Jose Felix Rodriguez Matas<sup>12</sup>, Bastien Chopard<sup>13</sup>, Franck Raynaud<sup>13</sup>, Remy Petkantchin<sup>13</sup>, Vanessa Blanc-Guillemaud<sup>14</sup>, Mikhail Panteleev<sup>15,16</sup>, Alexey Shibeko<sup>15</sup>, Karim Zouaoui Boudjeltia<sup>17</sup>

**Affiliations:** Department of Radiology and Nuclear Medicine<sup>1</sup>, Biomedical Engineering and Physics<sup>2</sup>, Neurology<sup>3</sup>, Amsterdam UMC, location University of Amsterdam, Amsterdam, the Netherlands; Computational Science Lab, Faculty of Science, Institute for Informatics, University of Amsterdam, Amsterdam, the Netherlands<sup>4</sup>, Department of Radiology and Nuclear Medicine<sup>5</sup>, Neurology<sup>6</sup>, Public Health<sup>7</sup>, Erasmus MC University Medical Center, PO Box 2040, 3000 CA Rotterdam, the Netherlands; Institute of Biomedical Engineering, Department of Engineering Science, University of Oxford, Parks Road, Oxford OX1 3PJ, UK<sup>8</sup>; Cerenovus, Galway Neuro Technology Centre, Galway, Ireland<sup>9</sup>; College of Engineering and Informatics, National University of Ireland Galway, Ireland; National Centre for Biomedical Engineering Science, National University of Ireland Galway, Ireland<sup>10</sup>; Laboratory for Thrombosis Research, KU Leuven Campus Kulak Kortrijk, Kortrijk, Belgium<sup>11</sup>; Laboratory of Biological Structure Mechanics, Department of Chemistry, Materials and Chemical Engineering 'Giulio Natta', Politecnico di Milano, Piazza Leonardo da Vinci 32, 20133 Milano, Italy<sup>12</sup>; Computer Science Department, University of Geneva, CUI, 7 route de Drize, 1227 Carouge, Switzerland<sup>13</sup>; Institut de Recherches Internationales Servier, Coubevoie Cedex, France<sup>14</sup>; Center for Theoretical Problems of Physicochemical Pharmacology RAS, Moscow, Russia<sup>15</sup>; Dmitry Rogachev National Research Center of Pediatric Hematology, Oncology and Immunology, Moscow, Russia; Faculty of Physics, Lomonosov Moscow State University, Moscow, Russia<sup>16</sup>; Laboratory of Experimental Medicine (ULB 222 Unit), Université Libre de Bruxelles (ULB), CHU de Charleroi, Belgium<sup>17</sup>

### 2. MR CLEAN Registry investigators

**Executive committee:** Diederik W.J. Dippel<sup>1</sup>; Aad van der Lugt<sup>2</sup>; Charles B.L.M. Majoie<sup>3</sup>; Yvo B.W.E.M. Roos<sup>4</sup>; Robert J. van Oostenbrugge<sup>5</sup>; Wim H. van Zwam<sup>6</sup>; Jelis Boiten<sup>14</sup>; Jan Albert Vos<sup>8</sup>

**Study coordinators:** Ivo G.H. Jansen<sup>3</sup>; Maxim J.H.L. Mulder<sup>1,2</sup>; Robert-Jan B. Goldhoorn<sup>5,6</sup>; Kars C.J. Compagne<sup>2</sup>; Manon Kappelhof<sup>3</sup>; Josje Brouwer<sup>4</sup>; Sanne J. den Hartog<sup>1,2,40</sup>; Wouter H. Hinsenveld<sup>5,6</sup>;

**Local principal investigators:** Diederik W.J. Dippel<sup>1</sup>; Bob Roozenbeek<sup>1</sup>; Aad van der Lugt<sup>2</sup>; Adriaan C.G.M. van Es<sup>2</sup>; Charles B.L.M. Majoie<sup>3</sup>; Yvo B.W.E.M. Roos<sup>4</sup>; Bart J. Emmer<sup>3</sup>; Jonathan M. Coutinho<sup>4</sup>; Wouter J. Schonewille<sup>7</sup>; Jan Albert Vos<sup>8</sup>; Marieke J.H. Wermer<sup>9</sup>; Marianne A.A. van Walderveen<sup>10</sup>; Julie Staals<sup>5</sup>; Robert J. van Oostenbrugge<sup>5</sup>; Wim H. van Zwam<sup>6</sup>; Jeannette Hofmeijer<sup>11</sup>; Jasper M.

Martens<sup>12</sup>; Geert J. Lycklama à Nijeholt<sup>13</sup>; Jelis Boiten<sup>14</sup>; Sebastiaan F. de Bruijn<sup>15</sup>; Lukas C. van Dijk<sup>16</sup>; H. Bart van der Worp<sup>17</sup>; Rob H. Lo<sup>18</sup>; Ewoud J. van Dijk<sup>19</sup>; Hieronymus D. Boogaarts<sup>20</sup>; J. de Vries<sup>22</sup>; Paul L.M. de Kort<sup>21</sup>; Juliavan Tuijl<sup>21</sup>; Jo P. Peluso<sup>26</sup>; Puck Fransen<sup>22</sup>; Jan S.P. van den Berg<sup>22</sup>; Boudewijn A.A.M. van Hasselt<sup>23</sup>; Leo A.M. Aerden<sup>24</sup>; René J. Dallinga<sup>25</sup>; Maarten Uyttenboogaart<sup>28</sup>; Omid Eschgi<sup>29</sup>; Reinoud P.H. Bokkers<sup>29</sup>; Tobien H.C.M.L. Schreuder<sup>30</sup>; Roel J.J. Heijboer<sup>31</sup>; Koos Keizer<sup>32</sup>; Lonneke S.F. Yo<sup>33</sup>; Heleen M. den Hertog<sup>22</sup>; Tomas Bulut<sup>35</sup>; Paul J.A.M. Brouwers<sup>34</sup>

**Imaging assessment committee:** Charles B.L.M. Majoie<sup>3</sup>(chair); Wim H. van Zwam<sup>6</sup>; Aad van der Lugt<sup>2</sup>; Geert J. Lycklama à Nijeholt<sup>13</sup>; Marianne A.A. van Walderveen<sup>10</sup>; Marieke E.S. Sprengers<sup>3</sup>; Sjoerd F.M. Jenniskens<sup>27</sup>; René van den Berg<sup>3</sup>; Albert J. Yoo<sup>38</sup>; Ludo F.M. Beenen<sup>3</sup>; Alida A. Postma<sup>6</sup>; Stefan D. Roosendaal<sup>3</sup>; Bas F.W. van der Kallen<sup>13</sup>; Ido R. van den Wijngaard<sup>13</sup>; Adriaan C.G.M. van Es<sup>2</sup>; Bart J. Emmer<sup>3</sup>; Jasper M. Martens<sup>12</sup>; Lonneke S.F. Yo<sup>33</sup>; Jan Albert Vos<sup>8</sup>; Joost Bot<sup>36</sup>; Pieter-Jan van Doormaal<sup>2</sup>; Anton Meijer<sup>27</sup>; Elyas Ghariq<sup>13</sup>; Reinoud P.H. Bokkers<sup>29</sup>; Marc P. van Proosdij<sup>37</sup>; G. Menno Krietemeijer<sup>33</sup>; Jo P. Peluso<sup>26</sup>; Hieronymus D. Boogaarts<sup>20</sup>; Rob Lo<sup>18</sup>; Dick Gerrits<sup>35</sup>; Wouter Dinkelaar<sup>2</sup>; Auke P.A. Appelman<sup>29</sup>; Bas Hammer<sup>16</sup>; Sjoert Pegge<sup>27</sup>; Anouk van der Hoorn<sup>29</sup>; Saman Vinke<sup>20</sup>.

**Writing committee:** Diederik W.J. Dippel<sup>1</sup>(chair); Aad van der Lugt<sup>2</sup>; Charles B.L.M. Majoie<sup>3</sup>; Yvo B.W.E.M. Roos<sup>4</sup>; Robert J. van Oostenbrugge<sup>5</sup>; Wim H. van Zwam<sup>6</sup>; Geert J. Lycklama à Nijeholt<sup>13</sup>; Jelis Boiten<sup>14</sup>; Jan Albert Vos<sup>8</sup>; Wouter J. Schonewille<sup>7</sup>; Jeannette Hofmeijer<sup>11</sup>; Jasper M. Martens<sup>12</sup>; H. Bart van der Worp<sup>17</sup>; Rob H. Lo<sup>18</sup>

**Adverse event committee:** Robert J. van Oostenbrugge<sup>5</sup>(chair); Jeannette Hofmeijer<sup>11</sup>; H. Zwenneke Flach<sup>23</sup>

**Trial methodologist:** Hester F. Lingsma<sup>40</sup>

**Research nurses / local trial coordinators:** Naziha el Ghannouti<sup>1</sup>; Martin Sterrenberg<sup>1</sup>; Wilma Pellikaan<sup>1</sup>; Rita Sprengers<sup>4</sup>; Marjan Elfrink<sup>11</sup>; Michelle Simons<sup>11</sup>; Marjolein Vossers<sup>12</sup>; Joke de Meris<sup>14</sup>; Tamara Vermeulen<sup>14</sup>; Annet Geerlings<sup>19</sup>; Gina van Vemde<sup>22</sup>; Tiny Simons<sup>30</sup>; Gert Messchendorp<sup>28</sup>; Nynke Nicolaij<sup>28</sup>; Hester Bongenaar<sup>32</sup>; Karin Bodde<sup>24</sup>; Sandra Kleijn<sup>34</sup>; Jasmijn Lodico<sup>34</sup>; Hanneke Droste<sup>34</sup>; Maureen Wollaert<sup>5</sup>; Sabrina Verheesen<sup>5</sup>; D. Jeurissen<sup>5</sup>; Erna Bos<sup>9</sup>; Yvonne Drabbe<sup>15</sup>; Michelle Sandiman<sup>15</sup>; Nicoline Aaldering<sup>11</sup>; Berber Zweedijk<sup>17</sup>; Jocova Vervoort<sup>21</sup>; Eva Ponjee<sup>22</sup>; Sharon Romviel<sup>19</sup>; Karin Kanselaar<sup>19</sup>; Denn Barning<sup>10</sup>.

**PhD / Medical students:** Esmee Venema<sup>40</sup>; Vicky Chalos<sup>1,40</sup>; Ralph R. Geuskens<sup>3</sup>; Tim van Straaten<sup>19</sup>; Saliha Ergezen<sup>1</sup>; Roger R.M. Harmsma<sup>1</sup>; Daan Muijres<sup>1</sup>; Anouk de Jong<sup>1</sup>; Olvert A. Berkhemer<sup>1,3,6</sup>; Anna M.M. Boers<sup>3,39</sup>; J. Huguet<sup>3</sup>; P.F.C. Groot<sup>3</sup>; Marieke A. Mens<sup>3</sup>; Katinka R. van Kranendonk<sup>3</sup>; Kilian M. Treurniet<sup>3</sup>; Manon L. Tolhuisen<sup>3,39</sup>; Heitor Alves<sup>3</sup>; Annick J. Weterings<sup>3</sup>; Eleonora L.F. Kirkels<sup>3</sup>; Eva J.H.F. Voogd<sup>11</sup>; Lieve M. Schupp<sup>3</sup>; Sabine L. Collette<sup>28,29</sup>; Adrien E.D. Groot<sup>4</sup>; Natalie E. LeCouffe<sup>4</sup>; Praneeta R. Konduri<sup>39</sup>; Haryadi Prasetya<sup>39</sup>; Nerea Arrarte-Terreros<sup>39</sup>; Lucas A. Ramos<sup>39</sup>.

**Affiliations:** Department of Neurology<sup>1</sup>, Radiology<sup>2</sup>, Public Health<sup>40</sup>, Erasmus MC University Medical Center; Department of Radiology and Nuclear Medicine<sup>3</sup>, Neurology<sup>4</sup>, Biomedical Engineering and Physics<sup>39</sup>, Amsterdam UMC, University of Amsterdam, Amsterdam; Department of Neurology<sup>5</sup>, Radiology<sup>6</sup>, Maastricht University Medical Center and Cardiovascular Research Institute Maastricht (CARIM); Department of Neurology<sup>7</sup>, Radiology<sup>8</sup>, Sint Antonius Hospital, Nieuwegein; Department of Neurology<sup>9</sup>, Radiology<sup>10</sup>, Leiden University Medical Center;

Department of Neurology<sup>11</sup>, Radiology<sup>12</sup>, Rijnstate Hospital, Arnhem; Department of Radiology<sup>13</sup>, Neurology<sup>14</sup>, Haaglanden MC, the Hague; Department of Neurology<sup>15</sup>, Radiology<sup>16</sup>, Haga Hospital, the Hague; Department of Neurology<sup>17</sup>, Radiology<sup>18</sup>, University Medical Center Utrecht; Department of Neurology<sup>19</sup>, Neurosurgery<sup>20</sup>, Radiology<sup>27</sup>, Radboud University Medical Center, Nijmegen; Department of Neurology<sup>21</sup>, Radiology<sup>26</sup>, Elisabeth-TweeSteden ziekenhuis, Tilburg; Department of Neurology<sup>22</sup>, Radiology<sup>23</sup>, Isala Klinieken, Zwolle; Department of Neurology<sup>24</sup>, Radiology<sup>25</sup>, Reinier de Graaf Gasthuis, Delft; Department of Neurology<sup>28</sup>, Radiology<sup>29</sup>, University Medical Center Groningen; Department of Neurology<sup>30</sup>, Radiology<sup>31</sup>, Atrium Medical Center, Heerlen; Department of Neurology<sup>32</sup>, Radiology<sup>33</sup>, Catharina Hospital, Eindhoven; Department of Neurology<sup>34</sup>, Radiology<sup>35</sup>, Medical Spectrum Twente, Enschede; Department of Radiology<sup>36</sup>, Amsterdam UMC, Vrije Universiteit van Amsterdam, Amsterdam; Department of Radiology<sup>37</sup>, Noordwest Ziekenhuisgroep, Alkmaar; Department of Radiology<sup>38</sup>, Texas Stroke Institute, Texas, United States of America.

### **3. MR CLEAN trial investigators**

Olvert A. Berkhemer, Amsterdam UMC, location AMC, the Netherlands and Erasmus MC-University Medical Center Rotterdam, the Netherlands. Puck S.S. Fransen, Erasmus MC-University Medical Center Rotterdam, the Netherlands. Debbie Beumer, Erasmus MC-University Medical Center Rotterdam, the Netherlands and Maastricht University Medical Center and Cardiovascular Research Institute Maastricht (CARIM), the Netherlands. Berkhemer, Fransen, and Beumer contributed equally. Lucie A. van den Berg, Amsterdam UMC, location AMC, the Netherlands. Hester F. Lingsma, Erasmus MC-University Medical Center Rotterdam, the Netherlands. Albert J. Yoo, Massachusetts General Hospital, Boston, United States of America. Wouter J. Schonewille, Saint Antonius Hospital, Nieuwegein, the Netherlands. Jan Albert Vos, MD, Sint Antonius Hospital, Nieuwegein, the Netherlands. Paul J. Nederkoorn, Amsterdam UMC, location AMC, the Netherlands. Marieke J.H. Wermer and Marianne A.A. van Walderveen, Leiden University Medical Center, the Netherlands. Julie Staals, Maastricht University Medical Center and Cardiovascular Research Institute Maastricht (CARIM), the Netherlands. Jeannette Hofmeijer and Jacques A. van Oostayen, Rijnstate Hospital, Arnhem, the Netherlands. Geert J. Lycklama à Nijeholt and Jelis Boiten, MC Haaglanden, the Hague, the Netherlands. Patrick A. Brouwer and Bart J. Emmer, Erasmus MC-University Medical Center Rotterdam, the Netherlands. Sebastiaan F. de Bruijn and Lukas C. van Dijk, Haga Hospital, the Hague, the Netherlands. L. Jaap Kappelle, University Medical Center Utrecht, the Netherlands. Rob H. Lo, University Medical Center Utrecht, the Netherlands. Ewoud J. van Dijk and Joost de Vries, Radboud University Medical Center, Nijmegen, the Netherlands. Paul L.M. de Kort and Willem Jan J. van Rooij, Sint Elisabeth Hospital, Tilburg, the Netherlands. Jan S.P. van den Berg and Boudewijn A.A.M. van Hasselt, Isala Klinieken, Zwolle, the Netherlands. Leo A.M. Aerden and René J. Dallinga, Reinier de Graaf Gasthuis, Delft, the Netherlands. Marieke C. Visser and Joseph C.J. Bot, Amsterdam UMC, location VU, Amsterdam, the Netherlands. Patrick C. Vroomen and Omid Eshghi, University Medical Center Groningen, the Netherlands. Tobien H.C.M.L. Schreuder and Roel J.J. Heijboer, Atrium Medical Center, Heerlen, the Netherlands. Koos Keizer and Alexander V. Tielbeek, Catharina Hospital, Eindhoven, the Netherlands. Heleen M. den Hertog and Dick G. Gerrits, Medical Spectrum Twente, Enschede, the Netherlands. Renske M. van den Berg-Vos and Giorgos B. Karas, Sint Lucas Andreas Hospital,

Amsterdam, the Netherlands. Ewout W. Steyerberg, Erasmus MC-University Medical Center Rotterdam, the Netherlands. H. Zwenneke Flach, Isala Klinieken, Zwolle, the Netherlands. Henk A. Marquering and Marieke E.S. Sprengers, Amsterdam UMC, location AMC, the Netherlands. Sjoerd F.M. Jenniskens, Radboud University Medical Center, Nijmegen, the Netherlands. Ludo F.M. Beenen and René van den Berg, Amsterdam UMC, location AMC, the Netherlands. Peter J. Koudstaal and Wim H. van Zwam, Erasmus MC-University Medical Center Rotterdam, the Netherlands. Yvo B.W.E.M. Roos, Amsterdam UMC, location AMC, the Netherlands. Aad van der Lugt, Erasmus MC-University Medical Center Rotterdam, the Netherlands. Robert J. van Oostenbrugge, Maastricht University Medical Center and Cardiovascular Research Institute Maastricht (CARIM), the Netherlands. Charles B.L.M. Majoie, Amsterdam UMC, location AMC, the Netherlands. Diederik W.J. Dippel, Erasmus MCUniversity Medical Center Rotterdam, the Netherlands. van Zwam, Roos, van der Lugt, van Oostenbrugge, Majoie and Dippel contributed equally.
